# Supplementary material for: Transcription Factors Control the Virulence-Associated Metabolic Enzymes and Membrane Proteins in Response to Nutrient Bioavailability in Cryptococcal Infection
Source: Preprints.org preprint supplement (doi:10.20944/preprints202306.1372.v1), 2023-06-19
Supplement: Supplementary file 1 [file supplementary]

## Supplementary File:

*Genes, Transcription Factors, Protein Kinases, Intracellular Proteins, and Other Abbreviations as Used in the Article*

**Aap** – amino acid permease  
**Aat** – amino acid transporter  
**Aca** – adenylyl cyclase-associated protein  
**Acc1** – acetyl-CoA decarboxylase  
**Acl1** – ATP-citrate lyase  
**Aco1** – aconitase  
**Acs1** – acetyl-CoA synthetase for histone acetylation  
**Acs2/Kbc1** – 2-ketobutyryl-CoA synthetase  
**Ada2** – histone acetyltransferase complex SAGA/ADA  
**Ady2** – acetate transporter  
**Afr1** – ATP-binding cassette transporter  
**Ags** –  $\alpha$ -1,3-glucan synthase  
**Agt1** –  $\alpha$ -glucoside transporter or maltose permease  
**Ald1** – aldehyde dehydrogenase  
**Ald5** – aldehyde dehydrogenase  
**AMPK** – 5' adenosine monophosphate-activated protein kinase  
**Amt1/Mep1** – ammonium permease/transporter  
**Aox1** – alternative oxidase  
**Apc** – amino acid-polyamine-organocation secondary carrier protein (APC) superfamily (including the amino acid-polyamine-organocation (APC), the amino acid/auxin permease (AAAP), the alanine or glycine:cation symporter (AGCS), the cation-chloride cotransporter (CCC), the hydroxy/aromatic amino acid permease (HAAAP), the betaine/carnitine/choline transporter (BCCT), the solute:sodium symporter (SSS), the neurotransmitter:sodium symporter (NSS), the nucleobase:cation symporter-1 (NCS1), the nucleobase:cation symporter-2 or nucleobase:ascorbate transporter (NCS2), the sulfate permease (SulP) as family members)  
**Apn1/2** – DNA-apurinic/apyrimidinic site lyase (endonuclease) 1 and 2 function in the base excision repair pathway  
**Aro80** – transcription activator of genes involved in the tolerance and metabolism of aromatic amino acids  
**Atf1** – *Cre*-binding basic leucine-zipper (bZIP) domain activating transcription factor regulated by Hog1  
**Atg** – serine/threonine-protein kinase involved in autophagy  
**Atg26** – UDP-glucose:sterol glucosyltransferase in the biosynthesis of sterol glucoside membrane lipids  
**Atg4** – C54 peptidase family protein  
**Atg8** – autophagy-related protein (a ubiquitin-like protein associated with phosphatidylethanolamine) involved in autophagosome  
**Atm1** – mitochondrial inner membrane ABC transporter/iron-sulfur clusters transporter Atm1p  
**Atp1** –  $\alpha$ -subunit F<sub>0</sub>F<sub>1</sub>-type ATP synthase  
**Bck1** – bypass of *c* kinase – an activator of mitogen-activated protein kinase  
**Bwc** – Basidiomycete white collar  
**Cac1** – *Cryptococcus* adenylyl cyclase  
**Cam1** – calmodulin  
**Can** – carbonic anhydrase CO<sub>2</sub>-sensor  
**Cbk** – cell wall biosynthesis serine/threonine kinase (a member of RAM signalling network protein kinase belonging to the AGC kinase family)  
**Cbp** – ubiquinol-cytochrome c chaperone  
**Ccc1/2** – copper transporter, a P-type ATPase  
**Cda** – chitin deacetylase  
**Cdc** – cell division cycle transcription factors  
**Cdc10** – septin *aspD*  
**Cdc11** – septin *aspA*  
**Cdc12** – septin *aspC*  
**Cdc14** – phosphoprotein phosphatase  
**Cdc16/23** – anaphase-promoting complex subunits protein  
**Cdc24** – a GEF protein mediating a conserved signalling event for thermotolerance, polarised growth, and pathogenesis via Ras1, Cdc24, Cdc42, and Pak kinase Ste20  
**Cdc31** – EF-hand Ca<sup>2+</sup>-binding protein

**Cdc36** – CCR4-NOT transcription complex  
**Cdc4** – myosin regulatory light chain  
**Cdc40** – cell division cycle 40  
**Cdc420** – a paralogue of Cdc42 gene  
**Cdc43** – encoding  $\beta$ -subunit of geranylgeranyltransferase-1 (Ggtase-1), catalysing the attachment of hydrophobic isoprenoid moieties onto C-terminal CaaX motifs (cysteine, 2 aliphatic amino acids, and variable amino acid)  
**Cdk** – cyclin-dependent kinase  
**Cdk8** – cyclin-dependent protein kinase *c*, and a suppressor of Snf1; a homologue of yeast Ssn3  
**Chs** – chitin synthase  
**Cin1** – cryptococcal intersectin 1 (human endocytic ITSN1 homologue)  
**Cir1/2** – *Cryptococcus* iron regulator electron transfer flavoprotein-ubiquinone oxidoreductase homologue of *S. cerevisiae*  
**Clr6** – cryptic loci regulator encoding putative class I histone deacetylase that removes an acetyl group from  $\epsilon$ -N-acetyl-lysine amino acid residue on a histone, thereby enhancing tighter wrapping of histones on DNA to prevent access to transcription factors and DNA expression. Clr6p is a transcriptional epigenetic repressor of the Mat2 – Mat3 region and centromere for precise heterochromatin packaging during chromosomal segregation in fission yeast  
**Cna/Cnb** – temperature- and calcium-induced calcineurin, inhibited by FK506  
**Coq10** – ubiquinone-binding protein  
**Coq11** – a putative protein involved in FMN-dependent decarboxylation in CoQ biosynthesis  
**Cpk1** – putative MAP kinase Ubc3  
**Cpp** – *Cryptococcus* purine/cytosine permease, e.g., Cpp2 homologues of *S. cerevisiae* Fcy2 and Fcy21  
**Cpr** – constitutive pheromone receptor, e.g., *Cpra* gene is a *MATa* strain-specific gene encoding putative seven-transmembrane domain pheromone receptors with diverse functions – mating, virulence, and capsule  
**Cps1** – hyaluronic acid synthase/celluluburonic synthase essential in transcellular transmigration  
**Cps1/10** – vacuolar carboxypeptidase yscS  
**CPY** – carboxypeptidase Y  
**Cqs1/2 (Qsp1/2)** – *Cryptococcus* quorum sensing-like molecule/quorum sensing-like protein  
**Crg** – a regulator of G-protein signalling  
**CRIB** – Cdc42/Rac interaction binding domain, e.g., Ste20p, which can interact via CRIB with Cdc42p, activate Rac1p and Dch2p  
**Crk1** – Cdk-related kinase 1  
**Crz1/Sp1** – cell wall transcriptional regulator known as calcineurin-responsive zinc finger 1  
**CSR** – common stress response/regulatory genes  
**Csr1, Csr2, Csr3** – chitin synthase regulators  
**Cta11** – catalase 1  
**Cta12/Cat3** – catalase, homologue of *S. cerevisiae*  
**Ctr1** – high-affinity copper transporter  
**Cwc1/2** – *Cryptococcus* white collar photoregulator, a homologue of *N. Crassa* white collar 1 and 2 (Wc-1/2)  
**Cwc24** – pre-mRNA-splicing factor homologue of *S. pombe* Cwf24p  
**CWI** – cell wall integrity  
**Ddc1** – DNA damage checkpoint protein associated with Mec1  
**Ena1/5/50/51/52** – Na<sup>+</sup> or K<sup>+</sup> P-type membrane ATPase cation transporter  
**Erg** – ergosterol regulatory gene  
**Erg1** – squalene epoxidase/monooxygenase  
**Erg10** – acetyl-CoA acetyltransferase  
**Erg11** – *Cyt P<sub>450</sub>* lanosterol 14 $\alpha$ -demethylase  
**Erg110** –  $\Delta^{14}$ -sterol demethylase activity with heme-binding pocket  
**Erg13** – 3-hydroxy-3-methylglutaryl-CoA (HMG-CoA) synthase in mevalonate biosynthesis  
**Erg2** –  $\Delta^8$ -sterol isomerase  
**Erg20** – polyprenyl synthetase  
**Erg24** –  $\Delta^{14}$ -sterol reductase  
**Erg25** –  $\Delta^4$ -methylsterol oxidase (sterol desaturase)  
**Erg26** –  $\Delta^3$ -sterol dehydrogenase/3- $\beta$ -hydroxysteroid dehydrogenase, a homologue of *S. cerevisiae*  
**Erg27** – 3-keto sterol reductase  
**Erg3** –  $\Delta^5$ -sterol desaturase  
**Erg4** –  $\Delta^{24/28}$ -sterol reductase

**Erg5** –  $\Delta^{22}$ -sterol desaturase  
**Erg50** –  $\Delta^{22}$ -sterol desaturase with cyt *P<sub>450</sub>*  
**Erg6** –  $\Delta^{24}$ -sterol methyltransferase  
**Erg7** – lanosterol synthase  
**Erg8** – phosphomevalonate kinase  
**Erk** – extracellular signal-regulated kinase MAPK with T-E-Y motif (Cpk1 and Mpk1)  
**ESR** – environmental stress response/regulatory groups of genes/ER-stress response genes  
**Fet** – iron transporter  
**Fet3/5** – ferroxidase/multicopper oxidase or iron transporter  
**Fhb1** – flavohemoglobin denitrosylase (nitric oxide dioxygenase)  
**Fre2/7/20** – cell surface iron reductase/ferric-chelate reductase  
**Ftr/Fth** – high-affinity ferrous iron permease/transporter (*Cft* gene in *C. neoformans*)  
**Fzc31** – fungal-specific Zn<sub>2</sub>Cys<sub>6</sub> DNA binding protein regarded as a core virulence transcription factor for thermotolerance, antioxidation, and mating but inhibit melanin formation  
**Gat** – transcriptional activator capable of binding -G-A-T-A- sequence within the DNA to regulate other genes. Popular GATAs are zinc-finger protein families, such as Gat1, Gat2, and Gat3  
**Gcs1** – glucosylceramide synthase 1, which synthesises the membrane sphingolipid GlcCer from the C<sup>9</sup>-methyl ceramide  
**Gpa** – G-protein  $\alpha$  subunit  
**Gre2** – homologue of mammalian 3- $\beta$ -hydroxysteroid dehydrogenase (gene de respuesta an estrés –stress-responsive gene)  
**Grx** – glutathione-dependent oxidoreductase (e.g., Grx4 and Grx5 monothiol glutaredoxin in *C. neoformans* but Grx3 and Grx4 in *S. cerevisiae*)  
**GSR** – genotoxic stress response/regulatory groups of genes  
**Hap1** – haem-binding transcription factor  
**HMSR/HMR** – heavy-metal stress response/regulatory groups of genes/heavy-metal resistance  
**Hog1** – a *p38* family of MAPK with a T-G-Y motif  
**Hsp10** – mitochondrial matrix co-chaperonin ATPase inhibitor  
**Hsp104** – heat shock protein 104  
**Hsp12** – plasma membrane heat-shock protein for membrane organisation during stress conditions, homologue to Hsp122. While Hsp12 appears constitutive, Hsp122 is slightly induced in *C. neoformans*. Under the cAMP and Hog1 regulations, both chaperons are involved in polyene antifungal susceptibility  
**Hsp31** – DJ-1/Thi1/Pfp1 superfamily, yeast stress-inducible homodimeric heat shock protein chaperone with methylglyoxalase activity  
**Hsp60** – a tetradecameric mitochondrial chaperonin  
**Hsp70** – multifunctional ATP-dependent heat-shock molecular chaperon expressed against stress  
**Hsp78** – heat shock protein chaperone  
**Hsp90** – ATP-dependent molecular chaperone activator of protein turnover during stress  
**HTG** – high-temperature growth  
**Hxl1** – Hac1, Xbp1-Like gene 1 encoding UPR transcriptional factor  
**Icl1** – isocitrate lyase catabolising isocitrate into succinate and glyoxylate  
**Idh1/Idp1/Lys1** – isocitrate/isopropylmalate dehydrogenase  
**Idi1** – isopentenyl diphosphate  $\Delta^1$ -isomerase  
**Ilv1** – threonine deaminase in isoleucine biosynthesis  
**Ilv2** – acetolactate synthase for isoleucine and valine biosynthesis  
**Ilv3** – dihydroxyacid dehydratase in the branched-chain amino acid biosynthesis  
**Ilv5** – acetohydroxyacid reductoisomerase  
**Ipc1** – inositolphosphoceramide synthase  
**Ire1** – ER-resident transmembrane kinase/RNase  
**Jac1** – J-type accessory chaperone  
**Kcs1** – protein kinase *c* suppressor  
**Kic1** – serine/threonine-protein kinase related to Pak/Ste20 protein family  
**Kre** –  $\beta$ -glucan synthase  
**Leu1** – 2-isopropylmalate synthase  
**Leu2** – 3-isopropylmalate dehydrogenase – an Fe-S cluster protein required for leucine biosynthesis  
**Leu3** – a repressor that, together with Gcn4, regulates amino acid biosynthesis

**Leu9** –  $\alpha$ -isopropylmalate synthase II (2-isopropylmalate synthase) in leucine biosynthesis  
**Liv3** – a Wor1-motif DNA binding protein (orthologue of *C. albicans* Wor1)  
**LPL** – lysophospholipase  
**LPTA** – lysophospholipase/transacylase  
**Lys10** – dihydrodipicolinate synthase in lysine biosynthesis  
**Lys2** – aminoadipate-semialdehyde dehydrogenase  
**Lys2** –  $\alpha$ -aminoadipate reductase in lysine biosynthesis  
**Lys21** – homocitrate synthase isozyme in lysine biosynthesis  
**Lys4/Lys40/Lys41/Lys42** – homoaconitase, converting homocitrate to homoisocitrate in lysine biosynthesis  
**Mal** – hexose transporter  
**Man1** – phosphomannose isomerase  
**MAPK** – mitogen-activated protein kinases such as Mpk1, a homologue of *S. cerevisiae* Slt2 or human Erk5  
**May1** – major aspartyl peptidase 1  
**Mbs1** – APSES-like transcription factor (**Mbp1**- and orthologue of Swi4-like DNA binding protein 1)  
**Mbs2** – orthologue to Swi6-like DNA binding protein regulating the cell cycle. It can form a complex, Mbs1/Mbs2- or Swi4/Swi6-dependent cell cycle box-binding factor  
**Mdr1** – multidrug resistance protein 1  
**Met13** – methylenetetrahydrofolate reductase  
**Met14** – adenylylsulfate kinase  
**Met17** – cysteine synthase  
**Met2** – homoserine transacetylase  
**Met3** – sulfate adenylyltransferase/ATP sulfurylase  
**Met30** - sulfur metabolite repression control protein and a negative regulator of sulfur amino acids genes expression for biosynthesis  
**Met5** – nitrite and sulphite reductase with a 4Fe-4S binding domain  
**Met5/10** – sulfite reductase  $\alpha$ -subunit converting sulfite into sulfide  
**Met7** – folylpolyglutamate synthase  
**Mp88** – T cell-stimulating mannoprotein  
**Mrs4** – inner membrane solute transporter  
**Mup1** – high-affinity methionine/cysteine permease  
**Mup3** – low-affinity methionine/cysteine permease  
**NCR** – nitrogen catabolite repression  
**Ncs1** – neuronal calcium sensor 1  
**Nde2** – pyridine nucleotide-disulfide oxidoreductase, a homologue of *S. cerevisiae*  
**Ndh1**– mitochondria external NADH dehydrogenase  
**NF- $\kappa$ B** – nuclear factor kappa-light-chain-enhancer of activated B cells  
**Nha1** – Na<sup>+</sup>/H<sup>+</sup> antiporter induced for acidoresistance  
**Nic1** – nickel transporter  
**Nrg1/2** – putative C2H2-type transcription factor controlled by cAMP to regulate capsule production  
**NSR** – nitrosative stress regulatory groups of genes  
**OMSR** – osmotic stress response/regulatory groups of genes  
**Opt1** – oligopeptide transporter  
**OSR** – oxidative stress response/regulatory groups of genes  
**Pbx** – parallel  $\beta$ -helix repeat protein  
**Pck1** – phosphoenolpyruvate carboxykinase 1  
**Pcl12** – alternative cyclin  
**Pho4** – phosphate signalling pathway (PHO) activator  
**Pho81** – cyclin-dependent kinase (Cdk) inhibitor with conserved lysine surface cluster in the SPX domain  
**Pho84, Pho85, Pho89, Pho840** – high-affinity phosphate transporter/permease  
**Pka** – cAMP-dependent protein kinase A catalytic subunit  
**Pkc1** – protein kinase *c*  
**Pqp1** – pro-Qsp1 protease 1 (a secreted serine protease)  
**Ptp** – protein tyrosine kinase – Ptp1 and Ptp2 (a major negative repressor of Hog1 hyperphosphorylation)  
**Ptp1** – polyol transporter protein 1  
**Ptr** – peptide transporter  
**Pub1** – polyadenylated RNA-binding protein

**Puf4** – PUmilio-FBF (FEM-3 binding factor) homology domain family 4 of mRNA binding proteins very similar to yeast Mpt5. Together with **Lhp1** and **Pbp1** are calcineurin (Crz1) target genes for virulence and stress survival. They belong to P-bodies/stress granules

**Pum1** – translational repressing RNA-binding protein

**Rad17** – **Radiation-sensitive** cell cycle checkpoint protein associated with Mec1

**Rad24** – Radiation-sensitive protein that promotes the binding of Rad17-Mec3-Ddc1 complex to DNA

**Ras1** – GTPase involved in G-protein signalling in the adenylate cyclase-activating pathway

**Rho** – Rho-GTPase protein with C-terminal CAAX box motifs for prenylation and membrane localisation, a homologue of mammalian Rac proteins

**Rim101** – cell wall transcriptional regulator

**SCAP** – SREBP cleavage-activating protein (same as Scp1p)

**Sch9** – AGC/AKT protein kinase

**Sec** – exocyst complex component

**Sec13** – COPII protein

**Sec16** – COPII vesicle coat protein

**Sec27** – coatomer  $\beta$ -subunit

**Sec28** – COPI protein

**Sec4** – secretory vesicle-associated Rab GTPase

**Sec53** – phosphomannomutase:glycosylation secretory proteins

**Sec61** –  $\gamma$ -subunit of protein translocation complex for misfolded proteins out of ER

**Skn1** –  $\beta$ -glucan synthesis-associated protein putatively tagged glucosidase

**Smt1** – sphingolipid C9 methyltransferase

**Snf1** – sucrose non-fermenting serine/threonine-protein kinase 1 complex (homologue of AMPK in mammals)

**Snf3** – glucose permease

**Snf4** – Snf1 kinase complex with CBS binding domain

**Snf7** – sucrose non-fermenting protein 7 – a key regulator of the endosomal sorting complex required for transport (ESCRT)-III for the formation and cargo of multivesicular bodies (MVB). It is a vacuolar-sorting protein

**Soa1** – putative sulfonate/sulfur transporter

**Sod1** – copper/zinc cytoplasmic superoxide dismutase

**Sod2** – mitochondrial manganese superoxide dismutase

**SRE** – stress response elements

**SREBP** – mammalian sterol regulatory element-binding protein (*Sre* gene in fungus)

**Ssk1** – sensory transduction histidine kinase

**Ssn8/Srb11** – C-type cyclin protein associating with specific cyclin-dependent kinase (Cdk) like Cdk8

**Ssn801** – cyclin C

**Ssr** – specific-stress regulatory genes

**Suc2** – sucrose- and raffinose-degrading enzyme, invertase

**Sul1/Sul2** – sulfate transporter/permease

**Sur2** – sphinganine/sphingosine C-4 hydroxylase – an ER enzyme converting sphinganine to phytosphingosine; sterol desaturase

**Swe102** – a homologue of *S. cerevisiae* Swe1 checkpoint protein kinase that regulates yeast morphogenesis by inhibiting Cdk via phosphorylation, an anti-stress mechanism in the budding yeast

**Sxi1 $\alpha$**  – sex inducer 1 $\alpha$  for cell identity factor in MAT $\alpha$  similar to Sxi2 $\alpha$  in MAT $\alpha$

**Tah18** – NAPDH-dependent diflavin reductase

**Tao3** – RAM (Regulation of Ace2p activity and cellular Morphogenesis) is a cell polarity signalling network protein

**Tco** – two-component system

**Tps1** – trehalose-6-phosphate synthase, catalysing the conversion of UDP-glucose and glucose-6-phosphate to trehalose-6-phosphate. UDP-galactose is an epimer of UDP-glucose, which is reported as a poor substrate and inhibitor of Tps1

**Tps2** – trehalose-6-phosphate phosphatase

**Trp1** – phosphoribosyl anthranilate isomerase in tryptophan biosynthesis

**Trp2** – anthranilate synthase component I – ASCO-I of chorismate aminase

**Trp3** – anthranilate synthase component II – ASCOII of glutamine amidotransferase/phosphoribosyl anthranilate isomerase/indole glycerol phosphate synthase

**Trp4** – anthranilate phosphoribosyltransferase (APRT)

**Trp5** – tryptophan synthase

**Tsa1** – thiol-specific antioxidant thioredoxin peroxidase (thioredoxin-dependent peroxide reductase)  
**Usv101** – master regulator of *C. neoformans* pathogenesis and virulence, a C<sub>2</sub>H<sub>2</sub> yeast transcription factor orthologue  
**Uve1** – endonuclease for base/nucleotide excision repair pathway in UV-DNA damage  
**Uxs1** – UDP-xylose synthase/UDP-glucuronate decarboxylase 1  
**Vad1** – virulence-associated DEAD-Box RNA helicase-encoding protein, a member of the RCK/p54 subfamily of RNA  
**Vcx1** – Ca<sup>2+</sup>/H<sup>+</sup> antiporter  
**Vph1** – vacuolar/vesicular H<sup>+</sup>-ATPase proton pump  
**Vps1** – vacuolar protein sorting regulator, dynamin  
**Vps17** – a membrane coat complex retromer subunit Vps5/Snx1  
**Vps29/Vps36** – retrograde transporter (yeast vacuolar protein sorting-associated protein 29)  
**Vps34** – phosphatidylinositol-3-kinase (PI3K)  
**Vps4** – AAA<sup>+</sup>-type ATPase  
**Vrk1** – a homologue of vaccinia-related serine/threonine kinase induced by DNA damage  
**Yah1** – 2Fe-2S iron-sulfur cluster binding domain homologue of *S. cerevisiae*  
**Yor1** – yeast oligomycin resistance  
**Ypc** – alkaline phytoceramidase  
**Ypd** – phosphotransfer protein/phosphorelay intermediate protein
